# Supplementary material for: Untargeted blood serum proteomics identifies novel proteins related to neurological recovery after human spinal cord injury
Source: PubMed Central journal article supplement (PMC11256486; doi:10.1186/s12967-024-05344-y), 2024-07-17
Supplement: 12967_2024_5344_MOESM5_ESM.pdf [file 12967_2024_5344_MOESM5_ESM.pdf]

Angel Arevalo-Martin  
Hospital Nacional de Parapléjicos  
Finca la Peraleda, s/n  
45071 Toledo (Spain)  
Office number: +34 925247718  
E-mail: aarevalom@sescam.jccm.es

Dear Dr. Marincola,

On behalf of our group of authors, I would like to thank you for the opportunity to revise our manuscript for consideration to publish it at *Journal of Translational Medicine*.

We would also like to express our sincere gratitude to the reviewers for their highly insightful and constructive comments. We have prepared a revised version of the manuscript addressing the comments and suggestions from the reviewers.

Looking forward to hearing from you,

Yours sincerely,



Angel Arevalo-Martin
